1 **Racial and Sociodemographic Disparities in Blindness Associated with Primary Angle Closure**  
2 **Glaucoma in the United States: An IRIS<sup>®</sup> Registry Analysis**

3  
4 Sona N. Shah, MD<sup>1</sup>; Sarah Zhou, BS<sup>1</sup>; Carina Sanvicente, MD<sup>2</sup>; Bruce Burkemper, PhD, MPH<sup>1</sup>; Galo  
5 Apolo, MS<sup>1</sup>; Charles Li, BS<sup>3</sup>; Siying Li, MS<sup>3</sup>; Lynn Liu, MS<sup>3</sup>; Flora Lum, MD<sup>3</sup>; Sasan Moghimi, MD<sup>4</sup>;  
6 and Benjamin Xu, MD, PhD<sup>1</sup>

7  
8 1. Roski Eye Institute, Department of Ophthalmology, University of Southern California, Los Angeles,  
9 CA

10 2. Harvey & Bernice Jones Eye Institute, University of Arkansas for Medical Sciences, Little Rock, AK

11 3. American Academy of Ophthalmology, San Francisco, CA

12 4. Hamilton Glaucoma Center, Shiley Eye Institute, Department of Ophthalmology, University of  
13 California, San Diego, La Jolla, CA

14  
15 **Corresponding Author:** Benjamin Xu, Department of Ophthalmology, Keck School of Medicine at the  
16 University of Southern California, 1450 San Pablo Street, 4th Floor, Suite 4700, Los Angeles, CA 90033  
17 Phone number: 323-442-6780; Fax number: 323-442-6412

18 E-mail: [benjamin.xu@med.usc.edu](mailto:benjamin.xu@med.usc.edu)

19  
20 **Financial Support:** This work was supported by grants K23 EY029763 from the National Eye Institute,  
21 National Institute of Health, Bethesda, Maryland; an IRIS Registry Initiative Award from the American  
22 Glaucoma Society; and an unrestricted grant to the Department of Ophthalmology from Research to  
23 Prevent Blindness, New York, NY.

24 **Conflict of Interest:** No conflicting relationship exists for any author

25 **Short Title:** Disparities in Blindness with Primary Angle Closure Glaucoma

26 **Key Words:** Primary angle closure glaucoma, angle closure, blindness, healthcare disparities

27 **Abstract**

28 **Purpose:** To assess the prevalence and risk factors of blindness among patients newly diagnosed with  
29 primary angle closure glaucoma (PACG) in the United States (US).

30 **Design:** Retrospective cross-sectional study of patients from the American Academy of Ophthalmology  
31 IRIS<sup>®</sup> (Intelligent Research in Sight) Registry.

32 **Participants:** Patients in the IRIS<sup>®</sup> Registry between the years 2015 to 2019 with a new diagnosis of  
33 PACG and visual acuity (VA) data on or within 90 days prior to the date of diagnosis.

34 **Methods:** Eligible patients were aged 18 years and older and: (1) were observable in the database at least  
35 24 months prior to the index date of PACG diagnosis; (2) had no history of intraocular pressure (IOP)  
36 lowering drops, laser peripheral iridotomy (LPI), cataract surgery, or a diagnosis of pseudophakia unless  
37 preceded by a diagnosis of anatomical narrow angle (ANA); and (3) had no history of glaucoma surgery.  
38 Multivariable logistic regression models were developed to assess risk factors of blindness.

39 **Main Outcome Measures:** Any (one or both eyes) or bilateral (both eyes) blindness ( $VA \leq 20/200$ ) at  
40 first diagnosis of PACG.

41 **Results:** 43,901 patients with PACG in the IRIS<sup>®</sup> Registry met inclusion criteria. Overall prevalence of  
42 any and bilateral blindness were 11.5% and 1.8%, respectively. Black and Hispanic patients were at  
43 higher risk of any (OR=1.42 and 1.21, respectively;  $p < 0.001$ ) and bilateral (OR=2.04 and 1.53,  
44 respectively;  $p < 0.001$ ) blindness compared to non-Hispanic White patients adjusted for ocular  
45 comorbidities, including cataracts. Other factors associated with any blindness included age  $< 50$  or  $> 80$   
46 years, male sex, Medicaid or Medicare insurance category, and Southern or Western practice region  
47 (ORs  $> 1.28$ ;  $p \leq 0.01$ ). Diagnosis of ANA prior to diagnosis of PACG was protective against any  
48 (OR=0.56;  $p < 0.001$ ) and bilateral (OR=0.61;  $p < 0.001$ ) blindness.

49 **Conclusions:** Blindness affects 1 out of 9 patients with newly diagnosed PACG in the IRIS<sup>®</sup> Registry;  
50 Black and Hispanic patients and Medicaid and Medicare recipients are significantly more vulnerable.  
51 These findings highlight the severe ocular morbidity associated with PACG and the need for increased  
52 disease awareness and improved detection methods.

## 53 **Introduction**

54 Primary angle closure glaucoma (PACG) is a visually devastating disease and leading cause of  
55 irreversible blindness worldwide.<sup>1-3</sup> The current global prevalence of PACG is approximately 23 million,  
56 although this number is projected to rise to approximately 32 million by 2040 due to the aging of the  
57 world's population.<sup>1</sup> Any rise in the prevalence of PACG is problematic due to high rates of blindness  
58 associated with the disease; it is estimated that blindness affects 27.0% of those with PACG worldwide.<sup>3</sup>  
59 Quality of life (QoL), defined as an individual's experience of health, comfort, happiness, and ability to  
60 enjoy day-to-day life activities, is significantly diminished by blindness, especially in bilateral cases.<sup>4-6</sup>  
61 Blindness also has a profound impact on healthcare expenditures and the global economy; the economic  
62 burden of vision loss has been estimated to be \$134.2 billion annually in the United States (US) alone.<sup>7</sup>  
63 Therefore, there exists an urgent need to better understand the burden and risk factors of blindness  
64 secondary to treatable ocular diseases, such as PACG, on diverse patient populations.

65 While primary open angle closure glaucoma (POAG) is twice as common as PACG, PACG  
66 confers a two-fold higher risk of blindness.<sup>3</sup> Therefore, POAG and PACG are associated with a similar  
67 number of cases of blindness worldwide.<sup>8</sup> The visually devastating nature of PACG stems from  
68 anatomical mechanisms underlying the disease. Angle closure is characterized by contact between the  
69 peripheral iris and trabecular meshwork, which impedes outflow of aqueous humor from the eye.<sup>9</sup>  
70 Extensive angle closure can lead to complete obstruction of outflow, elevated intraocular pressure (IOP)  
71 that is higher than typically observed in open angle eyes, and rapid glaucomatous damage to the optic  
72 nerve. Laser and surgical treatments help alleviate angle closure, which effectively delay or prevent the  
73 onset of elevated IOP and PACG.<sup>10,11</sup> Therefore, many cases of irreversible blindness associated with  
74 PACG could be avoided if high-risk patients are identified and treated earlier in the disease course.

75 There are an estimated 700,000 people with PACG in the US.<sup>1</sup> However, the visual impact of  
76 PACG in the US is poorly studied, due in part to the low perceived impact of PACG among non-Asian  
77 individuals and the racial and ethnic diversity of the US population. In this study, we use data from the  
78 IRIS<sup>®</sup> Registry (Intelligent Research in Sight) to study the prevalence of blindness among patients newly

79 diagnosed with PACG in the US. The US has the highest total health expenditure per capita of  
80 worldwide; therefore, it is reasonable to speculate that there should be lower ocular morbidity associated  
81 with PACG in the US compared to other regions of the world.<sup>12-19</sup> We also assess sociodemographic  
82 factors to identify populations more vulnerable to PACG-associated blindness who could benefit from  
83 increased provider awareness and improved detection methods.

84

## 85 **Methods**

### 86 Data

87 The American Academy of Ophthalmology IRIS<sup>®</sup> Registry is a comprehensive clinical registry that  
88 includes data on approximately 441 million patient visits for over 73 million unique patients as of April 1,  
89 2022. Available eye-level clinical data (with specified laterality in the IRIS<sup>®</sup> Registry) included dates of  
90 clinical diagnoses (including PACG), visual acuity (VA), intraocular pressure (IOP), and dates of  
91 procedures including laser peripheral iridotomy (LPI) and cataract and glaucoma surgeries. Available  
92 patient-level clinical data included history of IOP-lowering medications (laterality not specified in the  
93 IRIS<sup>®</sup> Registry). Available patient-level sociodemographic data included age, race, sex, insurance  
94 category, and practice region. Race and ethnicity, which are cultural constructs with biological  
95 contribution through genetic heritage, are combined into a single variable in the IRIS<sup>®</sup> Registry. This  
96 study was approved by The University of Southern California Institutional Review Board. The study  
97 adhered to the tenets of the Declaration of Helsinki and complied with the Health Insurance Portability  
98 and Accountability Act.

99

### 100 Study Population Selection and Definitions

101 Inclusion in the study population required a new diagnosis of PACG. Eligible patients with newly  
102 diagnosed PACG were identified from the IRIS<sup>®</sup> Registry between 2015 to 2019. Inclusion in the study  
103 population required an index diagnosis of PACG based on *International Classification of Diseases Ninth*  
104 *Revision* (ICD-9) or *Tenth Revision* (ICD-10) codes (Supplementary Table 1). PACG diagnoses were

105 analyzed on the eye level. The index date of diagnosis was defined as the date of the first visit associated  
106 with a PACG diagnosis.

107 Eligible patients were aged 18 years and older with newly diagnosed PACG, defined as: (1)  
108 observable in the IRIS<sup>®</sup> Registry for at least 24 months prior to the index date of PACG diagnosis; (2) no  
109 history of IOP lowering drops, LPI, cataract surgery, or a diagnosis of pseudophakia unless preceded by a  
110 diagnosis of ANA (also referred to as primary angle closure without glaucoma) based on ICD or Current  
111 Procedural Terminology (CPT) codes (Supplementary Table 1); (3) no history of glaucoma surgery  
112 (defined as trabeculectomy, glaucoma shunt, and cyclophotocoagulation) based on CPT codes  
113 (Supplementary Table 1). Criterion 1 was implemented to ensure that cases of PACG were newly  
114 diagnosed, based on the standard-of-care practice of monitoring PACG patients at least once per year.  
115 Criterion 2 was implemented to ensure that patients who had potentially received angle closure  
116 interventions for a diagnosis of ANA rather than PACG would not be excluded from the analyses.  
117 Criterion 3 was implemented to ensure that patients who had previously received glaucoma interventions  
118 would not be designated as newly diagnosed PACG.

119 Visual acuity data from the index date of diagnosis were analyzed on the eye level. Blindness was  
120 defined as VA  $\leq$  20/200 in at least one eye (any blindness) or in both eyes (bilateral blindness) on or  
121 within 90 days prior to the index date of diagnosis. If multiple VAs were documented within that time  
122 frame, the VA closest to the index date was utilized. Patients without VA data from at least one eye with  
123 PACG on or within 90 days prior to the index date of diagnosis were excluded from the analysis. Only  
124 patients with bilateral VA data were eligible for analyses on bilateral blindness.

125

## 126 Statistical Analysis

127 Continuous data were expressed as means and standard deviations. Categorical data were expressed in  
128 proportions and percentages. Univariable and multivariable logistic regression analyses were performed  
129 to determine odds ratios (OR) for any and bilateral blindness adjusted for ocular comorbidities (cataracts,  
130 diabetic retinopathy, and macular degeneration diagnoses based on ICD codes). Variables significant at p

131 < 0.15 in univariable analysis were included in multivariable analysis. Separate multivariable models  
132 were developed for any blindness, bilateral blindness, and any blindness additionally adjusted for IOP.  
133 The threshold for statistical and clinical significance was set at  $OR \geq 1.20$  and  $p \leq 0.01$  to avoid  
134 interpretation of weak effects due to large sample size. All statistical analyses were performed using R  
135 (The R Foundation for Statistical Computing, Vienna, Austria).

136

## 137 **Results**

138 A total of 223,029 unique patients with an eye-level diagnosis of PACG from 2015 to 2019 were  
139 identified in the IRIS<sup>®</sup> Registry (Figure 1). There were 43,901 unique patients who met criteria for newly  
140 diagnosed PACG after patients were excluded based on the lack of a minimum 24-month lookback period  
141 (116,535 patients excluded), presence of prior treatment and surgical history (48,326 patients excluded),  
142 or the absence of VA data from at least one eye with PACG on or within the 90 days prior to the index  
143 date of diagnosis (14,267 patients excluded).

144 Out of 43,901 patients with VA data for at least one eye with newly diagnosed PACG, 5,064  
145 (11.54%) were blind in at least one eye; out of 41,904 patients with bilateral VA data, 736 (1.76%) were  
146 blind in both eyes (Table 1). The effects of age and race on prevalence of any blindness and bilateral  
147 blindness were similar. The proportion of any and bilateral blindness were highest in patients < 40  
148 (31.02% and 9.52%, respectively) and > 80 (18.60% and 3.60%, respectively) years of age; higher in  
149 males (13.71% and 1.95%, respectively) compared to females (10.41% and 1.66%, respectively); and  
150 higher in Black patients (14.2% and 2.93% respectively) and Hispanic patients (12.53% and 2.26%,  
151 respectively) compared to non-Hispanic White patients (Tables 1 and 2).

152 Multivariable logistic regression analysis showed significant associations between any blindness  
153 and the following parameters (Table 3): age groups < 40 ( $OR = 3.54$ , 95% CI 2.93-4.26), 40-49 ( $OR =$   
154  $1.41$ , 95% CI 1.18-1.68), and  $\geq 80$  years ( $OR = 1.79$ , 95% CI 1.60-2.02) compared to 50-59 years; Black  
155 race ( $OR = 1.42$ , 95% CI 1.29-1.57) or Hispanic ethnicity ( $OR = 1.21$ , 95% CI 1.10-1.33) compared to  
156 non-Hispanic White race; Southern ( $OR = 1.34$ , 95% CI 1.23-1.46) or Western ( $OR = 1.31$ , 95% CI 1.19-

157 1.44) practice regions compared to the Northeast practice region; Medicaid (OR = 2.06, 95% CI 1.75-  
158 2.42), Medicare fee-for-service (FFS) (OR = 1.51, 95% CI 1.37-1.65), or Medicare Managed (OR = 1.28,  
159 95% CI 1.13-1.46) insurance category compared to private insurance; history of cataract (OR = 1.57, 95%  
160 CI 1.45-1.69) or macular degeneration (OR = 1.37, 95% CI 1.18-1.60); and PACG diagnosis without  
161 prior ANA diagnosis (OR = 1.78, 95% CI 1.66-1.90). Female sex (OR = 0.75, 95% CI 0.71-0.80) was  
162 associated with significantly lower odds of any blindness compared to male sex.

163 Multivariable logistic regression analysis showed significant associations between bilateral  
164 blindness and the following parameters (Table 4): age groups < 40 (OR = 5.58, 95% CI 3.89-8.00) and >  
165 80 (OR = 1.82, 95% CI 1.35-2.45) years of age compared to 50-59 years; Black race (OR = 2.04, 95% CI  
166 1.64-2.53) or Hispanic ethnicity (OR = 1.53, 95% CI 1.23-1.90) compared to non-Hispanic White race;  
167 Southern (OR = 1.41, 95% CI 1.14-1.74) practice region compared to the Northeast practice region;  
168 Medicaid (OR = 3.85, 95% CI 2.71-5.48), Medicare fee-for-service (FFS) (OR = 2.70, 95% CI 2.07-  
169 3.51), or Medicare Managed (OR = 1.84, 95% CI 1.27-2.65) insurance categories compared to private  
170 insurance; history of cataract (OR = 1.48, 95% CI 1.23-1.78) or macular degeneration (OR = 1.74, 95%  
171 CI 1.25-2.40); and PACG diagnosis without prior ANA diagnosis (OR = 1.64, 95% CI 1.39-1.94) (Table  
172 4). Age group 70-79 years (OR = 0.52, 95% CI 0.35-0.71) was significantly associated with lower odds of  
173 bilateral blindness compared to 50-59 years.

174 The multivariable logistic regression model for any blindness was additionally adjusted for IOP  
175 (Supplementary Table 2). Results were similar to those from the multivariable model for any blindness  
176 without adjustment for IOP (Table 3); however, association with Western practice region was no longer  
177 significant, and diabetic retinopathy (OR = 2.00, 95% CI 1.65-2.42) was significantly associated with  
178 higher odds of any blindness (Supplementary Table 2).

179

## 180 **Discussion**

181 In this study, we used data from the IRIS<sup>®</sup> Registry to assess the prevalence and risk factors of blindness  
182 among patients with newly diagnosed PACG in the US. The overall prevalence of any and bilateral

183 blindness among patients with newly diagnosed PACG were 11.5% and 1.8%, respectively. There were  
184 significant racial disparities in the prevalence of PACG-associated blindness; Black and Hispanic patients  
185 had 42% and 21% higher odds of blindness compared to non-Hispanic White patients. Other  
186 sociodemographic factors associated with blindness included age < 40 or > 80 years, male sex, Medicaid  
187 or Medicare insurance, and Southern or Western practice region. Diagnosis of ANA prior to diagnosis of  
188 PACG was protective against any and bilateral blindness. These findings highlight deficiencies in current  
189 practice patterns related to PACG; specifically, the need for increased disease awareness among eye care  
190 providers and development of more effective clinical methods to detect patients at high-risk of PACG.

191         The overall prevalence of any blindness among patients with newly diagnosed PACG in the US  
192 was relatively high regardless of age, sex, and race. It is well-established that PACG is a visually  
193 devastating disease: a meta-analysis of 23 population-based studies estimated the prevalence of PACG-  
194 associated blindness to be 27.0%.<sup>3</sup> However, blindness rates vary widely by geographic region.<sup>3,12,14-16,20,21</sup>  
195 For example, studies conducted in more developed countries and/or urban regions reported lower  
196 prevalence of blindness: 5.3% in the Tajimi Study, 6.1% in the Kumejima Study, and 10.2% in the  
197 Singapore Chinese Eye Study.<sup>14,16,20</sup> Conversely, studies conducted in China consistently reported higher  
198 prevalence of blindness regardless of the degree of urbanization: 25.0% in the Beijing Eye Study, 25.5%  
199 in the Handan Eye Study, 42.9% in the Liwan Eye Study, and 71.7% in the Yunnan Minority Eye  
200 Study.<sup>12,15,21,22</sup> However, prior to our study, there was sparse information on PACG-associated visual  
201 morbidity among racial and ethnic populations in the US. Our findings provide compelling evidence that  
202 the US does not have substantially lower rates of PACG-associated blindness compared to other  
203 developed countries despite having higher healthcare expenditure per capita.

204         There are significant racial and ethnic differences in the prevalence of PACG-associated  
205 blindness; in this study, Black (14.20%, 1 per 7.0 cases) and Hispanic patients (12.53%, 1 per 8.0 cases)  
206 were disproportionately affected compared to non-Hispanic White (11.19%, 1 per 8.9 cases) and Asian  
207 patients (8.86%, 1 per 11.2 cases). These racial disparities were magnified for bilateral blindness: 1 in  
208 34.5 Black patients (2.93%) and 1 in 43.5 Hispanic patients (2.26%) were bilaterally blind compared to 1



209 in 64.5 non-Hispanic White patients (1.55%) and 1 in 81.3 Asian patients (1.23%). Furthermore, these  
210 disparities appear to be independent of IOP and ocular comorbidities, including cataracts. There are  
211 several likely explanations for these observations. First, it is widely recognized that PACG is most  
212 common among Asian individuals, with around half of global cases occurring in China.<sup>8,16-18,23,24</sup> In  
213 contrast, there is sparse information about the prevalence of PACG among other races and ethnicities. The  
214 Beaver Dam Eye Study reported low prevalence of PACG among Black and non-Hispanic White  
215 participants, finding only two definite cases of narrow-angle glaucoma in 4,926 participants; however, it  
216 is unclear how often angle assessments were performed.<sup>25</sup> Therefore, provider-level biases about racial or  
217 ethnic differences in PACG prevalence may contribute to greater vigilance about angle closure among  
218 Asian individuals. However, such biases should not lead to differences in angle closure detection between  
219 Black and non-Hispanic White patients, as both racial groups are thought to have low PACG prevalence.  
220 Second, there may be racial and ethnic differences in ocular biometry, such as anterior chamber depth,  
221 that could influence the likelihood of eye care providers performing gonioscopy to detect angle closure  
222 prior to development of glaucomatous damage.<sup>26,27</sup> Finally, differences in utilization of and access to eye  
223 care services between racial and ethnic groups could influence visual outcomes.<sup>28,29</sup> Overall, these  
224 findings support the need for additional research on racial and ethnic differences in anatomical  
225 mechanisms of angle closure and the development of more effective clinical methods to risk-stratify  
226 patients for PACG.

227 Older age over 80 years and younger age under 40 years were both risk factors for any and  
228 bilateral blindness compared to age 50-59 years. While age is a well-established risk factor for PACG,  
229 PACG tends to be rare in younger populations.<sup>12,13,30,31</sup> We speculate that the anatomical mechanisms  
230 underlying PACG differ between younger and older patients affected by blindness.<sup>31-33</sup> In older patients,  
231 cataract formation contributes to increased lens thickness and likely worsening of pupillary block and  
232 other lens-related mechanisms.<sup>34</sup> In younger patients, PACG may be attributed to other mechanisms of  
233 angle closure, such as severe forms of plateau iris syndrome, nanophthalmos, or other developmental or  
234 congenital anomalies, that contribute to more advanced disease and profound vision loss at first

235 diagnosis.<sup>31,33</sup> Although PACG is rare in younger patients, more effective detection and treatment of  
236 PACG in this subpopulation would have a longer-lasting benefit for patients and healthcare systems.

237 Patient sex, practice region, and insurance category were identified as additional risk factors for  
238 blindness. Male sex was identified as a risk factor for any blindness, which could be attributed to lower  
239 utilization of medical care among men, leading to later disease detection.<sup>35</sup> Patients seeking care in  
240 Western and Southern regions compared to the Northeast region were at higher risk for any and bilateral  
241 blindness, which could be attributed to differences in regional practices and screening methods. There  
242 may also be regional differences in access to care and density of eyecare providers that we could not  
243 account for due to limitations of IRIS<sup>®</sup> Registry data.<sup>36</sup> Finally, patients with Medicaid, Medicare FFS, or  
244 Medicare were at higher risk for any blindness compared to patients with private insurance. We speculate  
245 that insurance serves as a proxy for socioeconomic status in our analyses, as the IRIS<sup>®</sup> Registry does not  
246 contain data on patient income, net worth, education level, or health literacy. Therefore, the increased risk  
247 of blindness associated with certain insurance products may reflect the effects of these confounding  
248 factors.

249 The diagnosis of ANA prior to the diagnosis of PACG was protective against any and bilateral  
250 blindness, suggesting that earlier detection of ANA is associated with more favorable clinical outcomes.  
251 Gonioscopy is the current clinical standard for detecting angle closure and distinguishing POAG from  
252 PACG.<sup>2,37-39</sup> However, gonioscopy has a number of limitations, such as being expertise-dependent and  
253 potentially time-consuming or uncomfortable, that contribute to its underutilization.<sup>38</sup> In addition, around  
254 three-quarters of patients with newly diagnosed PACG in the US do not have a prior diagnosis of ANA.<sup>39</sup>  
255 While there are automated non-contact methods utilizing anterior segment OCT (AS-OCT) imaging and  
256 artificial intelligence (AI) to detect gonioscopic angle closure, these methods are not widely available for  
257 clinical use.<sup>40-42</sup> Our findings on PACG-associated blindness highlight the need to further develop and  
258 implement more convenient clinical tools to detect patients at risk for PACG.

259 Our study has several limitations. First, our analyses relied on clinical diagnoses of PACG  
260 provided by a large number of practicing ophthalmologists, some of which may not comply with the

261 formal definition of PACG proposed for epidemiological studies.<sup>43</sup> It is feasible that some cases of PACG  
262 were misclassified cases of ANA (angle closure without glaucoma) or POAG; this would likely lower our  
263 estimates of PACG-associated blindness. However, we intentionally avoided applying additional criteria  
264 to narrow the definition of PACG, which could introduce systematic biases toward higher estimates of  
265 PACG-associated blindness. Second, we did not have access to visual field data. Therefore, we could not  
266 adopt a more comprehensive definition of blindness that includes <20 degrees of visual field; this would  
267 likely lead to further underestimation of the visual impact of PACG. Third, the duration of our lookback  
268 period to establish PACG cases as newly diagnosed was at minimum two years. As the IRIS<sup>®</sup> Registry  
269 was recently launched in 2014, this substantially reduced our study sample size, which could limit the  
270 generalizability of our findings. Fourth, while we accounted for the three most common ocular co-  
271 morbidities (cataracts, age-related macular degeneration, and diabetic retinopathy) in our analyses, it is  
272 possible that other ocular diseases contributed to blindness. However, we believe that confounding is  
273 unlikely given that PACG has no known associations with systemic or other ocular diseases aside from  
274 cataracts. Finally, we cannot rule out that underlying racial and ethnic disparities in ocular health  
275 amplified racial and ethnic differences in the prevalence of blindness in our study.<sup>44</sup>

276 Our findings support that PACG is a visually devastating disease, even in the US. Historical  
277 epidemiological studies on PACG have shaped perception that the burden of PACG falls primarily on  
278 Asian patients, yet Black and Hispanic patients have significantly higher risk of PACG-associated  
279 blindness. These findings highlight the importance of renewed efforts to increase awareness about PACG  
280 and associated ocular morbidity. They also call into question the utilization of healthcare resources and  
281 the effectiveness of current practice patterns for detecting and managing patients at risk for PACG. We  
282 propose the development of more convenient and precise clinical tools for detecting and evaluating  
283 patients with angle closure, especially given the projected rise in PACG prevalence worldwide. Finally,  
284 this study demonstrates the importance and benefit of the IRIS<sup>®</sup> Registry for studying the broader impact  
285 of ocular diseases within the US and mitigating their damaging effects by identifying and raising  
286 awareness about vulnerable patient populations.

287

## 288 **Table and Figure Captions**

289 Figure 1. Attrition diagram of patients with diagnosis of PACG.

290 Table 1. Proportion of blindness in newly diagnosed PACG cases stratified by sex and age.

291 Table 2. Proportion of blindness in newly diagnosed PACG cases stratified by race and age.

292 Table 3. Univariable and multivariable analysis of risk factors for any blindness in PACG.

293 Table 4. Univariable and multivariable analysis of risk factors for bilateral blindness in PACG.

294 Supplementary Table 1. Diagnosis, procedure, and treatment codes used in the study.

295 Supplementary Table 2. Univariable and multivariable analysis of risk factors for any blindness in PACG  
296 additionally adjusted for IOP.

297

## 298 **Acknowledgements**

299 This work was supported by grants K23 EY029763 from the National Eye Institute, National Institute of  
300 Health, Bethesda, Maryland; an IRIS Registry Initiative Award from the American Glaucoma Society;  
301 and an unrestricted grant to the Department of Ophthalmology from Research to Prevent Blindness, New  
302 York, NY.

303

## 304 **References**

- 305 1. Tham YC, Li X, Wong TY, Quigley HA, Aung T, Cheng CY. Global prevalence of  
306 glaucoma and projections of glaucoma burden through 2040: a systematic review and meta-  
307 analysis. *Ophthalmology*. Nov 2014;121(11):2081-90. doi:10.1016/j.ophtha.2014.05.013
- 308 2. Congdon N, Wang F, Tielsch JM. Issues in the epidemiology and population-based screening  
309 of primary angle-closure glaucoma. *Surv Ophthalmol*. 1992 May-Jun 1992;36(6):411-23.  
310 doi:10.1016/s0039-6257(05)80022-0

- 311 3. George R, Panda S, Vijaya L. Blindness in glaucoma: primary open-angle glaucoma versus  
312 primary angle-closure glaucoma-a meta-analysis. *Eye (Lond)*. Oct 13  
313 2021;doi:10.1038/s41433-021-01802-9
- 314 4. Gupta V, Srinivasan G, Mei SS, Gazzard G, Sihota R, Kapoor KS. Utility values among  
315 glaucoma patients: an impact on the quality of life. *Br J Ophthalmol*. Oct 2005;89(10):1241-  
316 4. doi:10.1136/bjo.2005.068858
- 317 5. Ejiakor I, Achigbu E, Onyia O, Edema O, Florence UN. Impact of Visual Impairment and  
318 Blindness on Quality of Life of Patients in Owerri, Imo State, Nigeria. *Middle East Afr J*  
319 *Ophthalmol*. 2019 Jul-Sep 2019;26(3):127-132. doi:10.4103/meajo.MEAJO\_256\_18
- 320 6. Frick KD, Gower EW, Kempen JH, Wolff JL. Economic impact of visual impairment and  
321 blindness in the United States. *Arch Ophthalmol*. Apr 2007;125(4):544-50.  
322 doi:10.1001/archopht.125.4.544
- 323 7. Rein DB, Wittenborn JS, Zhang P, et al. The Economic Burden of Vision Loss and Blindness  
324 in the United States. *Ophthalmology*. Sep 21 2021;doi:10.1016/j.ophtha.2021.09.010
- 325 8. Quigley HA, Broman AT. The number of people with glaucoma worldwide in 2010 and  
326 2020. *Br J Ophthalmol*. Mar 2006;90(3):262-7. doi:10.1136/bjo.2005.081224
- 327 9. Weinreb RN, Aung T, Medeiros FA. The pathophysiology and treatment of glaucoma: a  
328 review. *JAMA*. May 14 2014;311(18):1901-11. doi:10.1001/jama.2014.3192
- 329 10. Azuara-Blanco A, Burr J, Ramsay C, et al. Effectiveness of early lens extraction for the  
330 treatment of primary angle-closure glaucoma (EAGLE): a randomised controlled trial.  
331 *Lancet*. Oct 01 2016;388(10052):1389-1397. doi:10.1016/S0140-6736(16)30956-4
- 332 11. Jiang Y, Friedman DS, He M, Huang S, Kong X, Foster PJ. Design and methodology of a  
333 randomized controlled trial of laser iridotomy for the prevention of angle closure in southern

- 334 China: the Zhongshan angle Closure Prevention trial. *Ophthalmic Epidemiol.* Oct  
335 2010;17(5):321-32. doi:10.3109/09286586.2010.508353
- 336 12. Wang L, Huang W, Huang S, et al. Ten-year incidence of primary angle closure in elderly  
337 Chinese: the Liwan Eye Study. *Br J Ophthalmol.* 03 2019;103(3):355-360.  
338 doi:10.1136/bjophthalmol-2017-311808
- 339 13. Foster PJ, Oen FT, Machin D, et al. The prevalence of glaucoma in Chinese residents of  
340 Singapore: a cross-sectional population survey of the Tanjong Pagar district. *Arch*  
341 *Ophthalmol.* Aug 2000;118(8):1105-11. doi:10.1001/archopht.118.8.1105
- 342 14. Baskaran M, Foo RC, Cheng CY, et al. The Prevalence and Types of Glaucoma in an Urban  
343 Chinese Population: The Singapore Chinese Eye Study. *JAMA Ophthalmol.* Aug  
344 2015;133(8):874-80. doi:10.1001/jamaophthalmol.2015.1110
- 345 15. Liang Y, Friedman DS, Zhou Q, et al. Prevalence and characteristics of primary angle-  
346 closure diseases in a rural adult Chinese population: the Handan Eye Study. *Invest*  
347 *Ophthalmol Vis Sci.* Nov 07 2011;52(12):8672-9. doi:10.1167/iovs.11-7480
- 348 16. Yamamoto T, Iwase A, Araie M, et al. The Tajimi Study report 2: prevalence of primary  
349 angle closure and secondary glaucoma in a Japanese population. *Ophthalmology.* Oct  
350 2005;112(10):1661-9. doi:10.1016/j.ophtha.2005.05.012
- 351 17. Vijaya L, George R, Arvind H, et al. Prevalence of primary angle-closure disease in an urban  
352 south Indian population and comparison with a rural population. The Chennai Glaucoma  
353 Study. *Ophthalmology.* Apr 2008;115(4):655-660.e1. doi:10.1016/j.ophtha.2007.05.034
- 354 18. Dandona L, Dandona R, Mandal P, et al. Angle-closure glaucoma in an urban population in  
355 southern India. The Andhra Pradesh eye disease study. *Ophthalmology.* Sep  
356 2000;107(9):1710-6. doi:10.1016/s0161-6420(00)00274-8

- 357 19. Papanicolas I, Woskie LR, Jha AK. Health Care Spending in the United States and Other  
358 High-Income Countries. *JAMA*. Mar 13 2018;319(10):1024-1039.  
359 doi:10.1001/jama.2018.1150
- 360 20. Yamamoto S, Sawaguchi S, Iwase A, et al. Primary open-angle glaucoma in a population  
361 associated with high prevalence of primary angle-closure glaucoma: the Kumejima Study.  
362 *Ophthalmology*. Aug 2014;121(8):1558-65. doi:10.1016/j.ophtha.2014.03.003
- 363 21. Wang YX, Xu L, Yang H, Jonas JB. Prevalence of glaucoma in North China: the Beijing Eye  
364 Study. *Am J Ophthalmol*. Dec 2010;150(6):917-24. doi:10.1016/j.ajo.2010.06.037
- 365 22. Wang Y, Cun Q, Li J, et al. Prevalence, ethnic differences and risk factors of primary angle-  
366 closure glaucoma in a multiethnic Chinese adult population: the Yunnan Minority Eye Study.  
367 *Br J Ophthalmol*. Dec 21 2021;doi:10.1136/bjophthalmol-2021-320241
- 368 23. Arkell SM, Lightman DA, Sommer A, Taylor HR, Korshin OM, Tielsch JM. The prevalence  
369 of glaucoma among Eskimos of northwest Alaska. *Arch Ophthalmol*. Apr 1987;105(4):482-  
370 5. doi:10.1001/archopht.1987.01060040052031
- 371 24. Foster PJ, Johnson GJ. Glaucoma in China: how big is the problem? *Br J Ophthalmol*. Nov  
372 2001;85(11):1277-82. doi:10.1136/bjo.85.11.1277
- 373 25. Klein BE, Klein R, Sponsel WE, et al. Prevalence of glaucoma. The Beaver Dam Eye Study.  
374 *Ophthalmology*. Oct 1992;99(10):1499-504. doi:10.1016/s0161-6420(92)31774-9
- 375 26. Oh YG, Minelli S, Spaeth GL, Steinman WC. The anterior chamber angle is different in  
376 different racial groups: a gonioscopic study. *Eye (Lond)*. 1994;8 ( Pt 1):104-8.  
377 doi:10.1038/eye.1994.20

- 378 27. Thompson AC, Vu DM, Cowan LA, Asrani S. Risk Factors Associated with Missed  
379 Diagnoses of Narrow Angles by the Van Herick Technique. *Ophthalmol Glaucoma*. 2018  
380 Sep - Oct 2018;1(2):108-114. doi:10.1016/j.ogla.2018.08.002
- 381 28. Shi Q, Zhao Y, Fonseca V, Krousel-Wood M, Shi L. Racial disparity of eye examinations  
382 among the U.S. working-age population with diabetes: 2002-2009. *Diabetes Care*.  
383 2014;37(5):1321-8. doi:10.2337/dc13-1038
- 384 29. Halawa OA, Kolli A, Oh G, et al. Racial and Socioeconomic Differences in Eye Care  
385 Utilization among Medicare Beneficiaries with Glaucoma. *Ophthalmology*. 04  
386 2022;129(4):397-405. doi:10.1016/j.ophtha.2021.09.022
- 387 30. Seah SK, Foster PJ, Chew PT, et al. Incidence of acute primary angle-closure glaucoma in  
388 Singapore. An island-wide survey. *Arch Ophthalmol*. Nov 1997;115(11):1436-40.  
389 doi:10.1001/archopht.1997.01100160606014
- 390 31. Gao F, Wang J, Chen J, Wang X, Chen Y, Sun X. Etiologies and clinical characteristics of  
391 young patients with angle-closure glaucoma: a 15-year single-center retrospective study.  
392 *Graefes Arch Clin Exp Ophthalmol*. Aug 2021;259(8):2379-2387. doi:10.1007/s00417-021-  
393 05172-6
- 394 32. Chang BM, Liebmann JM, Ritch R. Angle closure in younger patients. *Trans Am*  
395 *Ophthalmol Soc*. 2002;100:201-12; discussion 212-4.
- 396 33. Stieger R, Kniestedt C, Sutter F, Bachmann LM, Stuermer J. Prevalence of plateau iris  
397 syndrome in young patients with recurrent angle closure. *Clin Exp Ophthalmol*. Jul  
398 2007;35(5):409-13. doi:10.1111/j.1442-9071.2007.01510.x



- 399 34. Nongpiur ME, He M, Amerasinghe N, et al. Lens vault, thickness, and position in Chinese  
400 subjects with angle closure. *Ophthalmology*. Mar 2011;118(3):474-9.  
401 doi:10.1016/j.ophtha.2010.07.025
- 402 35. Benoit SR, Swenor B, Geiss LS, Gregg EW, Saaddine JB. Eye Care Utilization Among  
403 Insured People With Diabetes in the U.S., 2010-2014. *Diabetes Care*. 03 2019;42(3):427-  
404 433. doi:10.2337/dc18-0828
- 405 36. Cassard SD, Quigley HA, Gower EW, Friedman DS, Ramulu PY, Jampel HD. Regional  
406 variations and trends in the prevalence of diagnosed glaucoma in the Medicare population.  
407 *Ophthalmology*. Jul 2012;119(7):1342-51. doi:10.1016/j.ophtha.2012.01.032
- 408 37. Park SB, Sung KR, Kang SY, Jo JW, Lee KS, Kook MS. Assessment of narrow angles by  
409 gonioscopy, Van Herick method and anterior segment optical coherence tomography. *Jpn J*  
410 *Ophthalmol*. Jul 2011;55(4):343-350. doi:10.1007/s10384-011-0036-0
- 411 38. Varma DK, Simpson SM, Rai AS, Ahmed IIK. Undetected angle closure in patients with a  
412 diagnosis of open-angle glaucoma. *Can J Ophthalmol*. Aug 2017;52(4):373-378.  
413 doi:10.1016/j.jcjo.2016.12.010
- 414 39. Apolo G, Bohner A, Pardeshi A, et al. Racial and Sociodemographic Disparities in the  
415 Detection of Narrow Angles Prior to Primary Angle Closure Glaucoma in the United States.  
416 *Ophthalmol Glaucoma*. Jan 24 2022;doi:10.1016/j.ogla.2022.01.001
- 417 40. Xu BY, Chiang M, Chaudhary S, Kulkarni S, Pardeshi AA, Varma R. Deep Learning  
418 Classifiers for Automated Detection of Gonioscopic Angle Closure Based on Anterior  
419 Segment OCT Images. *Am J Ophthalmol*. 12 2019;208:273-280.  
420 doi:10.1016/j.ajo.2019.08.004

- 421 41. Pardeshi AA, Song AE, Lazkani N, Xie X, Huang A, Xu BY. Intradvice Repeatability and  
422 Interdevice Agreement of Ocular Biometric Measurements: A Comparison of Two Swept-  
423 Source Anterior Segment OCT Devices. *Transl Vis Sci Technol.* 08 2020;9(9):14.  
424 doi:10.1167/tvst.9.9.14
- 425 42. Shen A, Chiang M, Pardeshi AA, McKean-Cowdin R, Varma R, Xu BY. Anterior segment  
426 biometric measurements explain misclassifications by a deep learning classifier for detecting  
427 gonioscopic angle closure. *Br J Ophthalmol.* Oct 06 2021;doi:10.1136/bjophthalmol-2021-  
428 319058
- 429 43. Foster PJ, Buhrmann R, Quigley HA, Johnson GJ. The definition and classification of  
430 glaucoma in prevalence surveys. *Br J Ophthalmol.* Feb 2002;86(2):238-42.  
431 doi:10.1136/bjo.86.2.238
- 432 44. Sommer A, Tielsch JM, Katz J, et al. Racial differences in the cause-specific prevalence of  
433 blindness in east Baltimore. *N Engl J Med.* Nov 14 1991;325(20):1412-7.  
434 doi:10.1056/NEJM199111143252004
- 435

**Figure 1.** Attrition diagram of patients with newly diagnosed PACG in the IRIS® (Intelligent Research in Sight) Registry.

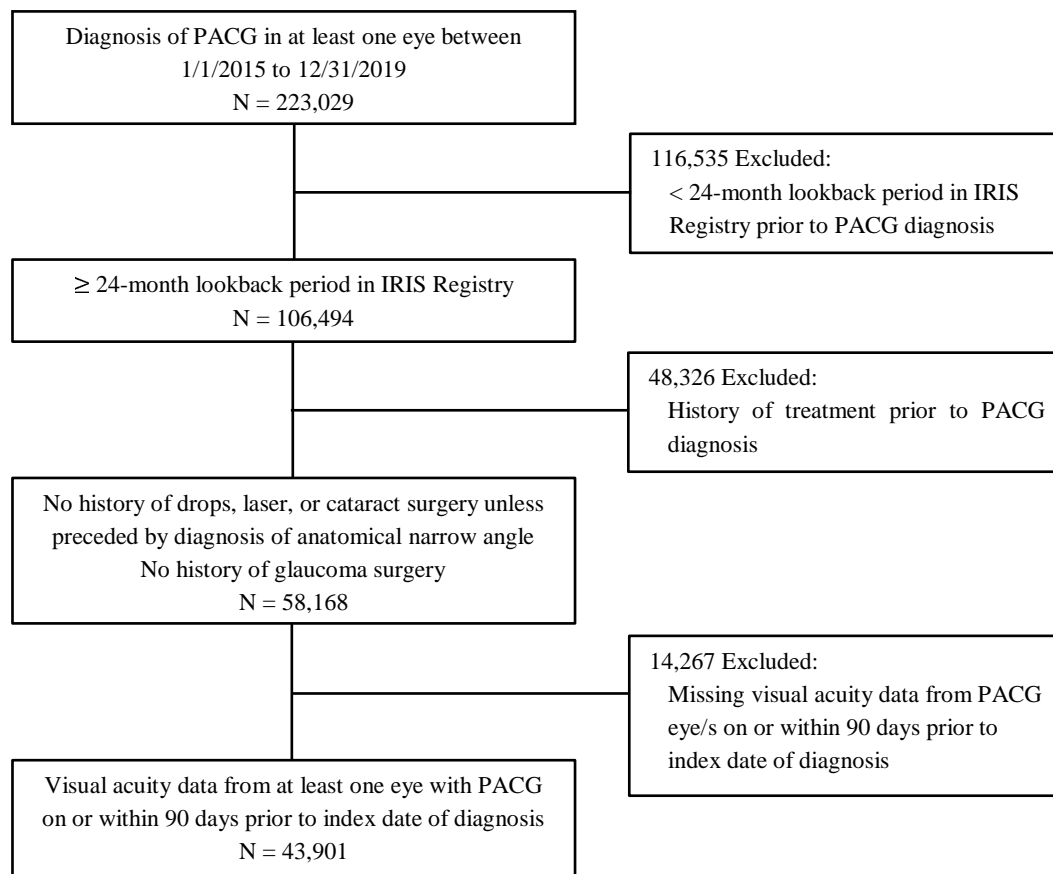

**Table 1.** Proportion of blindness in newly diagnosed PACG cases stratified by sex and age.

| <b>ANY* BLINDNESS</b> |             |           |        |               |           |        |                |           |        |                |           |        |
|-----------------------|-------------|-----------|--------|---------------|-----------|--------|----------------|-----------|--------|----------------|-----------|--------|
| <b>Age</b>            | <b>Male</b> |           |        | <b>Female</b> |           |        | <b>Unknown</b> |           |        | <b>Overall</b> |           |        |
|                       | N (PACG)    | N (Blind) | %      | N (PACG)      | N (Blind) | %      | N (PACG)       | N (Blind) | %      | N (PACG)       | N (Blind) | %      |
| <40                   | 299         | 104       | 34.78% | 416           | 119       | 28.61% | 7              | 1         | 14.29% | 722            | 224       | 31.02% |
| 40-49                 | 508         | 94        | 18.50% | 1063          | 106       | 9.97%  | 6              | 0         | 0.00%  | 1577           | 200       | 12.68% |
| 50-59                 | 1784        | 247       | 13.85% | 3962          | 265       | 6.69%  | 26             | 4         | 15.38% | 5772           | 516       | 8.94%  |
| 60-69                 | 4058        | 434       | 10.69% | 8636          | 658       | 7.62%  | 75             | 8         | 10.67% | 12769          | 1100      | 8.61%  |
| 70-79                 | 5066        | 594       | 11.73% | 9693          | 888       | 9.16%  | 91             | 15        | 16.48% | 14850          | 1497      | 10.08% |
| 80+                   | 2874        | 527       | 18.34% | 5291          | 990       | 18.71% | 46             | 10        | 21.74% | 8211           | 1527      | 18.60% |
| Overall               | 14589       | 2000      | 13.71% | 29061         | 3026      | 10.41% | 251            | 38        | 15.14% | 43901          | 5064      | 11.54% |

  

| <b>BILATERAL BLINDNESS</b> |             |           |        |               |           |       |                |           |       |                |           |       |
|----------------------------|-------------|-----------|--------|---------------|-----------|-------|----------------|-----------|-------|----------------|-----------|-------|
| <b>Age</b>                 | <b>Male</b> |           |        | <b>Female</b> |           |       | <b>Unknown</b> |           |       | <b>Overall</b> |           |       |
|                            | N (PACG)    | n (Blind) | %      | N (PACG)      | n (Blind) | %     | N (PACG)       | n (Blind) | %     | N (PACG)       | n (Blind) | %     |
| <40                        | 272         | 32        | 11.76% | 384           | 31        | 8.07% | 6              | 0         | 0.00% | 662            | 63        | 9.52% |
| 40-49                      | 464         | 14        | 3.02%  | 1009          | 18        | 1.78% | 5              | 0         | 0.00% | 1478           | 32        | 2.17% |
| 50-59                      | 1691        | 30        | 1.77%  | 3798          | 41        | 1.08% | 24             | 0         | 0.00% | 5513           | 71        | 1.29% |
| 60-69                      | 3861        | 63        | 1.63%  | 8301          | 81        | 0.98% | 71             | 3         | 4.23% | 12233          | 147       | 1.20% |
| 70-79                      | 4855        | 52        | 1.07%  | 9293          | 91        | 0.98% | 87             | 0         | 0.00% | 14235          | 143       | 1.00% |
| 80+                        | 2722        | 80        | 2.94%  | 5016          | 200       | 3.99% | 45             | 0         | 0.00% | 7783           | 280       | 3.60% |
| Overall                    | 13865       | 271       | 1.95%  | 27801         | 462       | 1.66% | 238            | 3         | 1.26% | 41904          | 736       | 1.76% |

PACG = primary angle closure glaucoma; N and n = number of patients.

\* Any refers to uni- or bilateral blindness.

**Table 2.** Proportion of blindness in newly diagnosed PACG cases stratified by race and age.

| ANY* BLINDNESS |                    |           |        |          |           |        |          |           |        |          |           |        |          |           |        |          |           |        |
|----------------|--------------------|-----------|--------|----------|-----------|--------|----------|-----------|--------|----------|-----------|--------|----------|-----------|--------|----------|-----------|--------|
| Age            | Non-Hispanic White |           |        | Black    |           |        | Hispanic |           |        | Asian    |           |        | Unknown  |           |        | Overall  |           |        |
|                | N (PACG)           | n (Blind) | %      | N (PACG) | n (Blind) | %      | N (PACG) | n (Blind) | %      | N (PACG) | n (Blind) | %      | N (PACG) | n (Blind) | %      | N (PACG) | n (Blind) | %      |
| <40            | 393                | 119       | 30.28% | 88       | 34        | 38.64% | 117      | 41        | 35.04% | 27       | 4         | 14.81% | 97       | 26        | 26.80% | 722      | 224       | 31.02% |
| 40-49          | 880                | 104       | 11.82% | 156      | 35        | 22.44% | 229      | 37        | 16.16% | 90       | 1         | 1.11%  | 222      | 23        | 10.36% | 1577     | 200       | 12.68% |
| 50-59          | 3267               | 259       | 7.93%  | 670      | 77        | 11.49% | 809      | 87        | 10.75% | 334      | 29        | 8.68%  | 692      | 64        | 9.25%  | 5772     | 516       | 8.94%  |
| 60-69          | 7584               | 639       | 8.43%  | 1471     | 155       | 10.54% | 1689     | 144       | 8.53%  | 704      | 48        | 6.82%  | 1321     | 114       | 8.63%  | 12769    | 1100      | 8.61%  |
| 70-79          | 9343               | 883       | 9.45%  | 1422     | 193       | 13.57% | 1926     | 216       | 11.21% | 750      | 65        | 8.67%  | 1409     | 140       | 9.94%  | 14850    | 1497      | 10.08% |
| 80+            | 5610               | 1027      | 18.31% | 645      | 138       | 21.40% | 840      | 178       | 21.19% | 353      | 53        | 15.01% | 763      | 131       | 17.17% | 8211     | 1527      | 18.60% |
| Overall        | 27077              | 3031      | 11.19% | 4452     | 632       | 14.20% | 5610     | 703       | 12.53% | 2258     | 200       | 8.86%  | 4504     | 498       | 11.06% | 43901    | 5064      | 11.54% |

  

| BILATERAL BLINDNESS |                    |           |       |          |           |        |          |           |        |          |           |       |          |           |       |          |           |       |
|---------------------|--------------------|-----------|-------|----------|-----------|--------|----------|-----------|--------|----------|-----------|-------|----------|-----------|-------|----------|-----------|-------|
| Age                 | Non-Hispanic White |           |       | Black    |           |        | Hispanic |           |        | Asian    |           |       | Unknown  |           |       | Overall  |           |       |
|                     | N (PACG)           | n (Blind) | %     | N (PACG) | n (Blind) | %      | N (PACG) | n (Blind) | %      | N (PACG) | n (Blind) | %     | N (PACG) | n (Blind) | %     | N (PACG) | n (Blind) | %     |
| <40                 | 367                | 34        | 9.26% | 80       | 12        | 15.00% | 112      | 14        | 12.50% | 23       | 0         | 0.00% | 80       | 3         | 3.75% | 662      | 63        | 9.52% |
| 40-49               | 825                | 13        | 1.58% | 141      | 8         | 5.67%  | 214      | 10        | 4.67%  | 85       | 1         | 1.18% | 213      | 0         | 0.00% | 1478     | 32        | 2.17% |
| 50-59               | 3146               | 41        | 1.30% | 615      | 12        | 1.95%  | 769      | 12        | 1.56%  | 321      | 1         | 0.31% | 662      | 5         | 0.76% | 5513     | 71        | 1.29% |
| 60-69               | 7331               | 71        | 0.97% | 1376     | 26        | 1.89%  | 1615     | 26        | 1.61%  | 662      | 5         | 0.76% | 1249     | 19        | 1.52% | 12233    | 147       | 1.20% |
| 70-79               | 9001               | 64        | 0.71% | 1349     | 35        | 2.59%  | 1844     | 25        | 1.36%  | 693      | 7         | 1.01% | 1348     | 12        | 0.89% | 14235    | 143       | 1.00% |
| 80+                 | 5333               | 180       | 3.38% | 606      | 29        | 4.79%  | 795      | 34        | 4.28%  | 331      | 12        | 3.63% | 718      | 25        | 3.48% | 7783     | 280       | 3.60% |
| Overall             | 26003              | 403       | 1.55% | 4167     | 122       | 2.93%  | 5349     | 121       | 2.26%  | 2115     | 26        | 1.23% | 4270     | 64        | 0.10% | 41904    | 736       | 1.76% |

PACG = primary angle closure glaucoma; N and n = number of patients.

\* Any refers to uni- or bilateral blindness.

**Table 3.** Univariable and multivariable analysis of risk factors for any\* blindness in PACG.

|                               | Any* Blindness |                 | Univariable Analysis |                  | Multivariable Analysis  |                         |                  |
|-------------------------------|----------------|-----------------|----------------------|------------------|-------------------------|-------------------------|------------------|
|                               | (+)            | (-)             | OR (CI)              | P value          | OR (CI)                 | P value                 |                  |
|                               | N (%)          | N (%)           |                      |                  |                         |                         |                  |
| <b>Total # PACG patients:</b> |                |                 |                      |                  |                         |                         |                  |
| <b>43,901</b>                 | 5,064 (11.54%) | 38,837 (88.46%) |                      |                  |                         |                         |                  |
| <b>Age [years]</b>            |                |                 |                      |                  |                         |                         |                  |
| 50-59                         | 516 (8.94%)    | 5,256 (91.06%)  | REF                  |                  | REF                     |                         |                  |
| <40                           | 224 (31.02%)   | 498 (68.98%)    | 4.58 (3.82-5.50)     | <0.001           | <b>3.54 (2.93-4.26)</b> | <b>&lt;0.001</b>        |                  |
| 40-49                         | 200 (12.68%)   | 1,377 (87.32%)  | 1.48 (1.24-1.76)     | <0.001           | <b>1.41 (1.18-1.68)</b> | <b>&lt;0.001</b>        |                  |
| 60-69                         | 1,100 (8.61%)  | 11,669 (91.39%) | 0.96 (0.86-1.07)     | 0.467            | 0.84 (0.75-0.95)        | 0.004                   |                  |
| 70-79                         | 1,497 (10.08%) | 13,353 (89.92%) | 1.14 (1.03-1.27)     | 0.013            | 0.92 (0.82-1.04)        | 0.169                   |                  |
| 80+                           | 1,527 (18.60%) | 6,684 (81.40%)  | 2.33 (2.10-2.59)     | <0.001           | <b>1.79 (1.60-2.02)</b> | <b>&lt;0.001</b>        |                  |
| <b>Sex</b>                    |                |                 |                      |                  |                         |                         |                  |
| Male                          | 2,000 (15.64%) | 12,589 (84.36%) | REF                  |                  | REF                     |                         |                  |
| Female                        | 3,026 (10.41%) | 26,035 (89.59%) | 0.73 (0.69-0.78)     | <0.001           | <b>0.75 (0.71-0.80)</b> | <b>&lt;0.001</b>        |                  |
| Not Reported                  | 38 (15.14%)    | 213 (84.86%)    | 1.12 (0.79-1.59)     | 0.514            | 1.12 (0.78-1.60)        | 0.530                   |                  |
| <b>Race</b>                   |                |                 |                      |                  |                         |                         |                  |
| Caucasian                     | 3,031 (11.19%) | 24,046 (88.81%) | REF                  |                  | REF                     |                         |                  |
| Asian                         | 200 (8.86%)    | 2,058 (91.14%)  | 0.77 (0.66-0.90)     | 0.001            | 0.82 (0.70-0.96)        | 0.014                   |                  |
| Black or African American     | 632 (14.20%)   | 3,820 (85.80%)  | 1.31 (1.20-1.44)     | <0.001           | <b>1.42 (1.29-1.57)</b> | <b>&lt;0.001</b>        |                  |
| Hispanic                      | 703 (12.53%)   | 4,907 (87.47%)  | 1.14 (1.04-1.24)     | 0.004            | <b>1.21 (1.10-1.33)</b> | <b>&lt;0.001</b>        |                  |
| Unknown                       | 498 (11.06%)   | 4,006 (88.94%)  | 0.99 (0.89-1.09)     | 0.787            | 1.00 (0.90-1.11)        | 0.967                   |                  |
| <b>Practice Region</b>        |                |                 |                      |                  |                         |                         |                  |
| Northeast                     | 995 (9.41%)    | 9,578 (90.59%)  | REF                  |                  | REF                     |                         |                  |
| Midwest                       | 1,138 (11.52%) | 8,741 (88.48%)  | 1.25 (1.15-1.37)     | <0.001           | 1.05 (0.96-1.16)        | 0.306                   |                  |
| South                         | 1,847 (12.86%) | 12,520 (87.14%) | 1.42 (1.31-1.54)     | <0.001           | <b>1.34 (1.23-1.46)</b> | <b>&lt;0.001</b>        |                  |
| West                          | 845 (11.87%)   | 6,275 (88.13%)  | 1.30 (1.18-1.43)     | <0.001           | <b>1.31 (1.19-1.44)</b> | <b>&lt;0.001</b>        |                  |
| Unknown                       | 239 (12.18%)   | 1,723 (87.82%)  | 1.34 (1.15-1.55)     | <0.001           | <b>1.23 (1.06-1.44)</b> | <b>0.007</b>            |                  |
| <b>Insurance Category</b>     |                |                 |                      |                  |                         |                         |                  |
| Private                       | 828 (8.43%)    | 8,998 (91.57%)  | REF                  |                  | REF                     |                         |                  |
| Government                    | 63 (9.18%)     | 623 (90.82%)    | 1.10 (0.84-1.44)     | 0.491            | 1.12 (0.85-1.48)        | 0.407                   |                  |
| Medicaid                      | 249 (17.29%)   | 1,191 (82.71%)  | 2.27 (1.95-2.65)     | <0.001           | <b>2.06 (1.75-2.42)</b> | <b>&lt;0.001</b>        |                  |
| Medicare FFS                  | 3,250 (12.76%) | 22,224 (87.24%) | 1.59 (1.47-1.72)     | <0.001           | <b>1.51 (1.37-1.65)</b> | <b>&lt;0.001</b>        |                  |
| Medicare Managed              | 445 (10.62%)   | 3,747 (89.38%)  | 1.29 (1.14-1.46)     | <0.001           | <b>1.28 (1.13-1.46)</b> | <b>&lt;0.001</b>        |                  |
| Military                      | 29 (12.29%)    | 207 (87.71%)    | 1.52 (1.03-2.26)     | 0.037            | 1.35 (0.90-2.03)        | 0.141                   |                  |
| Unknown/Missing               | 200 (9.77%)    | 1,847 (90.23%)  | 1.18 (1.00-1.38)     | 0.049            | 1.12 (0.95-1.33)        | 0.168                   |                  |
| <b>Ocular comorbidities</b>   |                |                 |                      |                  |                         |                         |                  |
| Cataract                      | No             | 3,746 (10.51%)  | 31,899 (89.49%)      | REF              | REF                     |                         |                  |
|                               | Yes            | 1,318 (15.96%)  | 6,938 (84.04%)       | 1.63 (1.52-1.74) | <0.001                  | <b>1.57 (1.45-1.69)</b> | <b>&lt;0.001</b> |
| Diabetic Retinopathy          | No             | 4,728 (11.28%)  | 37,173 (88.72%)      | REF              | REF                     |                         |                  |
|                               | Yes            | 336 (16.80%)    | 1,664 (83.20%)       | 1.58 (1.40-1.78) | <0.001                  | 1.04 (0.89-1.22)        | 0.626            |
| Macular Degeneration          | No             | 4,659 (11.16%)  | 37,096 (88.84%)      | REF              | REF                     |                         |                  |
|                               | Yes            | 405 (18.87%)    | 1,741 (81.13%)       | 1.83 (1.64-2.05) | <0.001                  | <b>1.37 (1.18-1.60)</b> | <b>&lt;0.001</b> |
| <b>ANA prior to PACG</b>      |                |                 |                      |                  |                         |                         |                  |
|                               | Yes            | 1,406 (8.33%)   | 15,476 (91.67%)      | REF              | REF                     |                         |                  |
|                               | No             | 3,658 (13.54%)  | 23,361 (86.46%)      | 1.72 (1.62-1.84) | <0.001                  | <b>1.78 (1.66-1.90)</b> | <b>&lt;0.001</b> |

ANA = anatomic narrow angle; CI = confidence interval; N = number of patients; OR = odds ratio; FFS = fee-for-service; PACG = primary angle closure glaucoma.

\* Any refers to uni- or bilateral blindness.

Statistically significant multivariable p-values and odds ratios with OR  $\geq$  1.20 and p  $\leq$  0.01 are bolded.

**Table 4.** Univariable and multivariable analysis of risk factors for bilateral blindness in PACG.

|                               | Bilateral Blindness |                        | Univariable Analysis |                  | Multivariable Analysis  |                         |                  |
|-------------------------------|---------------------|------------------------|----------------------|------------------|-------------------------|-------------------------|------------------|
|                               | (+)                 | (-)                    | OR (CI)              | P value          | OR (CI)                 | P value                 |                  |
| <b>Total # PACG patients:</b> | <b>736 (1.76%)</b>  | <b>41,168 (98.24%)</b> |                      |                  |                         |                         |                  |
|                               | <b>41,904</b>       |                        |                      |                  |                         |                         |                  |
| <b>Age [years]</b>            |                     |                        |                      |                  |                         |                         |                  |
| 50-59                         | 71 (1.29%)          | 5,442 (98.71%)         | REF                  |                  | REF                     |                         |                  |
| <40                           | 63 (9.52%)          | 599 (90.48%)           | 8.06 (5.68-11.44)    | <0.001           | <b>5.58 (3.89-8.00)</b> | <b>&lt;0.001</b>        |                  |
| 40-49                         | 32 (2.17%)          | 1,446 (97.83%)         | 1.70 (1.11-2.59)     | 0.014            | 1.63 (1.07-2.50)        | 0.024                   |                  |
| 60-69                         | 147 (1.20%)         | 12,086 (98.80%)        | 0.93 (0.70-1.24)     | 0.630            | 0.71 (0.52-0.96)        | 0.024                   |                  |
| 70-79                         | 143 (1.00%)         | 14,092 (99.00%)        | 0.78 (0.58-1.04)     | 0.085            | <b>0.52 (0.38-0.71)</b> | <b>&lt;0.001</b>        |                  |
| 80+                           | 280 (3.60%)         | 7,503 (96.40%)         | 2.86 (2.20-3.72)     | <0.001           | <b>1.82 (1.35-2.45)</b> | <b>&lt;0.001</b>        |                  |
| <b>Sex</b>                    |                     |                        |                      |                  |                         |                         |                  |
| Male                          | 271 (1.95%)         | 13,594 (98.05%)        | REF                  |                  | REF                     |                         |                  |
| Female                        | 462 (1.66%)         | 27,339 (98.34%)        | 0.85 (0.73-0.99)     | 0.032            | 0.89 (0.76-1.04)        | 0.134                   |                  |
| Not Reported                  | 3 (1.26%)           | 235 (98.74%)           | 0.64 (0.20-2.01)     | 0.446            | 0.57 (0.18-1.83)        | 0.344                   |                  |
| <b>Race</b>                   |                     |                        |                      |                  |                         |                         |                  |
| Caucasian                     | 403 (1.55%)         | 25,600 (98.45%)        | REF                  |                  | REF                     |                         |                  |
| Asian                         | 26 (1.23%)          | 2,089 (98.77%)         | 0.79 (0.53-1.18)     | 0.249            | 0.93 (0.62-1.41)        | 0.742                   |                  |
| Black or African American     | 122 (2.93%)         | 4,045 (97.07%)         | 1.92 (1.56-2.35)     | <0.001           | <b>2.04 (1.64-2.53)</b> | <b>&lt;0.001</b>        |                  |
| Hispanic                      | 121 (2.26%)         | 5,228 (97.74%)         | 1.47 (1.20 - 1.81)   | <0.001           | <b>1.53 (1.23-1.90)</b> | <b>&lt;0.001</b>        |                  |
| Unknown                       | 64 (1.50%)          | 4,206 (98.50%)         | 0.967 (.074-1.26)    | 0.802            | 1.00 (0.76-1.32)        | 0.990                   |                  |
| <b>Practice Region</b>        |                     |                        |                      |                  |                         |                         |                  |
| Northeast                     | 133 (1.32%)         | 9,916 (98.68%)         | REF                  |                  | REF                     |                         |                  |
| Midwest                       | 160 (1.67%)         | 9,408 (98.33%)         | 1.27 (1.01-1.60)     | 0.045            | 0.952 (0.74-1.22)       | 0.701                   |                  |
| South                         | 290 (2.12%)         | 13,379 (97.88%)        | 1.62 (1.31-1.99)     | <0.001           | <b>1.41 (1.14-1.74)</b> | <b>0.001</b>            |                  |
| West                          | 111 (1.64%)         | 6,647 (98.36%)         | 1.25 (0.97-1.61)     | 0.091            | 1.21 (0.93-1.57)        | 0.157                   |                  |
| Unknown                       | 42 (2.26%)          | 1,818 (97.74%)         | 1.72 (1.21-2.45)     | 0.002            | 1.49 (1.05-2.13)        | 0.027                   |                  |
| <b>Insurance Category</b>     |                     |                        |                      |                  |                         |                         |                  |
| Private                       | 83 (0.88%)          | 9,348 (99.12%)         | REF                  |                  | REF                     |                         |                  |
| Government                    | 4 (0.61%)           | 648 (99.39%)           | 0.70 (0.25-1.90)     | 0.479            | 0.69 (0.25-1.91)        | 0.479                   |                  |
| Medicaid                      | 60 (4.45%)          | 1,287 (95.55%)         | 5.25 (3.75-7.36)     | <0.001           | <b>3.85 (2.71-5.48)</b> | <b>&lt;0.001</b>        |                  |
| Medicare FFS                  | 499 (2.05%)         | 23,810 (97.95%)        | 2.36 (1.87-2.98)     | <0.001           | <b>2.70 (2.07-3.51)</b> | <b>&lt;0.001</b>        |                  |
| Medicare Managed              | 53 (1.33%)          | 3,930 (98.67%)         | 1.52 (1.07-2.15)     | 0.018            | <b>1.84 (1.27-2.65)</b> | <b>0.001</b>            |                  |
| Military                      | 6 (2.71%)           | 215 (97.29%)           | 3.14 (1.36-7.28)     | 0.008            | 2.71 (1.15-6.36)        | 0.022                   |                  |
| Unknown/Missing               | 31 (1.58%)          | 1,930 (98.42%)         | 1.81 (1.19-2.74)     | 0.005            | <b>1.82 (1.19-2.78)</b> | <b>0.005</b>            |                  |
| <b>Ocular comorbidities</b>   |                     |                        |                      |                  |                         |                         |                  |
| Cataract                      | No                  | 529 (1.55%)            | 33,580 (98.45%)      | REF              | REF                     |                         |                  |
|                               | Yes                 | 207 (2.66%)            | 7,588 (97.34%)       | 1.73 (1.47-2.04) | <0.001                  | <b>1.48 (1.23-1.78)</b> | <b>&lt;0.001</b> |
| Diabetic Retinopathy          | No                  | 667 (1.67%)            | 39,299 (98.33%)      | REF              | REF                     |                         |                  |
|                               | Yes                 | 69 (3.56%)             | 1,869 (96.44%)       | 2.18 (1.69-2.80) | <0.001                  | 1.28 (0.91-1.81)        | 0.153            |
| Macular Degeneration          | No                  | 656 (1.65%)            | 39,186 (98.35%)      | REF              | REF                     |                         |                  |
|                               | Yes                 | 80 (3.88%)             | 1,982 (96.12%)       | 2.41 (1.90-3.05) | <0.001                  | <b>1.74 (1.25-2.40)</b> | <b>0.001</b>     |
| <b>ANA prior to PACG</b>      |                     |                        |                      |                  |                         |                         |                  |
|                               | Yes                 | 204 (1.26%)            | 16,024 (98.74%)      | REF              | REF                     |                         |                  |
|                               | No                  | 532 (2.07%)            | 25,144 (97.93%)      | 1.66 (1.41-1.96) | <0.001                  | <b>1.64 (1.39-1.94)</b> | <b>&lt;0.001</b> |

ANA = anatomic narrow angle; CI = confidence interval; N = number of patients; OR = odds ratio; FFS = fee-for-service; PACG = primary angle closure glaucoma.

Statistically significant multivariable p-values and odds ratios with OR ≥ 1.20 and p ≤ 0.01 are bolded.
